# Supplementary material for: Adenosine Signaling Is Prognostic for Cancer Outcome and Has Predictive Utility for Immunotherapeutic Response
Source: Oxford University Press journal article supplement (doi:10.1158/1078-0432.ccr-19-2183), 2020-01-17
Supplement: 10780432ccr192183-sup-224995_3_supp_6018524_q41664.pdf [file 10780432ccr192183-sup-224995_3_supp_6018524_q41664.pdf]

Supplemental Figure 5

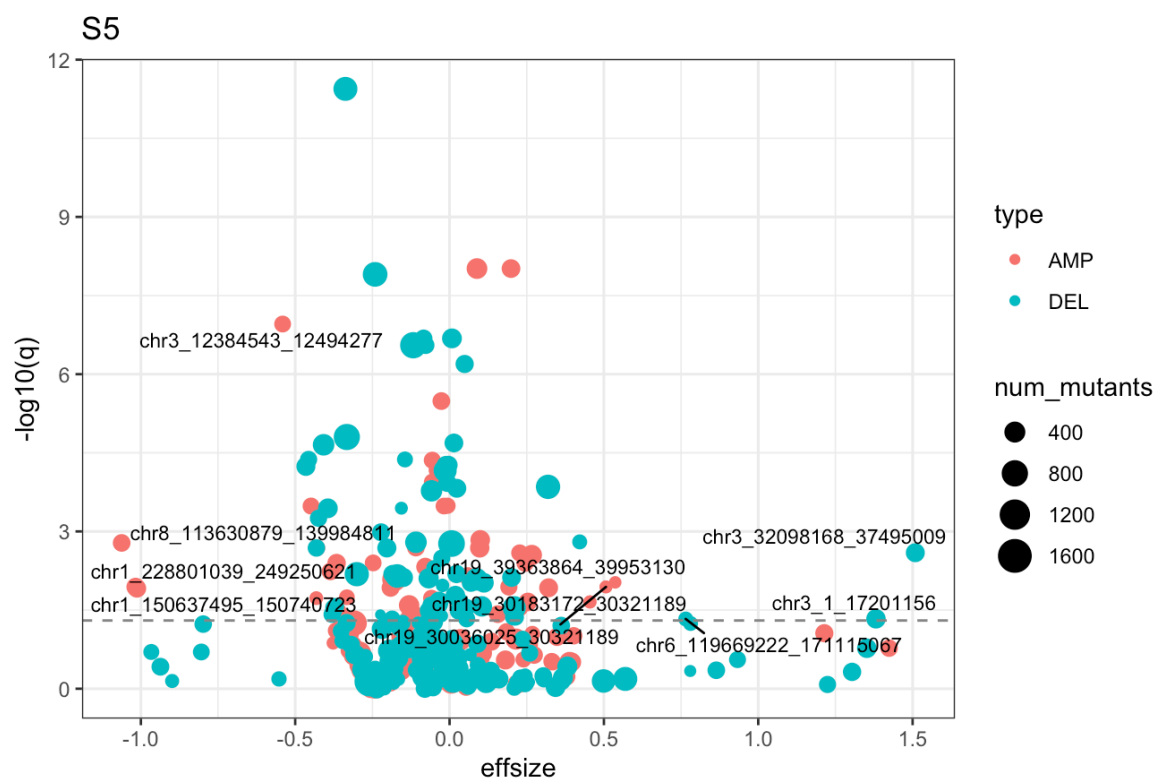

**Supplemental Figure 5:** Somatic copy number alterations (SCNA) are also associated with adenosine signalling. 124 SCNA are significant ( $q < 0.05$ ) with 11 having an effect size greater than 0.5. This includes a deletion on chromosome 3 which removes *VHL* and replicates the observation seen with SNVs.
